# Supplementary material for: Systematic Identification and Evolutionary Analysis of Catalytically Versatile Cytochrome P450 Monooxygenase Families Enriched in Model Basidiomycete Fungi
Source: PubMed Central journal article supplement (PMC3899305; doi:10.1371/journal.pone.0086683), 2014-01-22
Supplement: pone.0086683.s003.pdf [file pone.0086683.s003.pdf]

**Figure S3**

|                          | Protein size<br>(amino acids) | Gene structure<br>(exons/introns organization) | Gene location<br>(scaffold) |
|--------------------------|-------------------------------|------------------------------------------------|-----------------------------|
| CYP5150D8(92219)Ppla     | 554                           |                                                | 181                         |
| CYP5150D9(92220)Ppla     | 546                           |                                                | 181                         |
| CYP5150D5(56431)Ppla     | 548                           |                                                | 31                          |
| CYP5150D16v1(58496)Ppla  | 539                           |                                                | 38                          |
| CYP5150D16v2(89777)Ppla  | 527                           |                                                | 81                          |
| CYP5150D7(56490)Ppla     | 552                           |                                                | 31                          |
| CYP5150D1(56521)Ppla     | 548                           |                                                | 31                          |
| CYP5150D6(107860)Ppla    | 231                           |                                                | 31                          |
| CYP5150D4(56515)Ppla     | 546                           |                                                | 31                          |
| CYP5150D20(46717)Ppla    | 533                           |                                                | 41                          |
| CYP5150D2(56458)Ppla     | 451                           |                                                | 31                          |
| CYP5150D18(21309)Ppla    | 472                           |                                                | 107                         |
| CYP5150D17v1(97505)Ppla  | 578                           |                                                | 14                          |
| CYP5150D17v2(97728)Ppla  | 1054                          |                                                | 65                          |
| CYP5150D19(57109)Ppla    | 562                           |                                                | 9                           |
| CYP5150D21(62768)Ppla    | 508                           |                                                | 75                          |
| CYP5150D14v1(44177)Ppla  | 493                           |                                                | 20                          |
| CYP5150D15v1(120723)Ppla | 547                           |                                                | 46                          |
| CYP5150D15v2(116443)Ppla | 500                           |                                                | 238                         |
| CYP5150D11v1(55398)Ppla  | 544                           |                                                | 142                         |
| CYP5150D11v2(89660)Ppla  | 540                           |                                                | 21                          |
| CYP5150D12v1(114266)Ppla | 543                           |                                                | 177                         |
| CYP5150D13v1(20385)Ppla  | 526                           |                                                | 96                          |
| CYP5150D13v2(51235)Ppla  | 546                           |                                                | 5                           |
| CYP5150D22(127929)Ppla   | 821                           |                                                | 309                         |
| CYP5150F1(51017)Ppla     | 536                           |                                                | 154                         |
| CYP5150E1v2(56875)Ppla   | 535                           |                                                | 27                          |
| CYP5150E1v1(94692)Ppla   | 598                           |                                                | 33                          |

**Figure S3 continued**

|                       | Protein size<br>(amino acids) | Gene structure<br>(exons/introns organization) | Gene location<br>(scaffold) |
|-----------------------|-------------------------------|------------------------------------------------|-----------------------------|
| CYP5150D25(166498)Gsp | 549                           |                                                | 12                          |
| CYP5150D24(157234)Gsp | 547                           |                                                | 12                          |
| CYP5150D23(56993)Gsp  | 555                           |                                                | 12                          |
| CYP5150D27(147311)Gsp | 541                           |                                                | 1                           |
| CYP5150D29(122823)Gsp | 545                           |                                                | 12                          |
| CYP5150D28(157358)Gsp | 564                           |                                                | 12                          |
| CYP5150M5(152188)Gsp  | 548                           |                                                | 5                           |
| CYP5150M(46275)Gsp    | 552                           |                                                | 4                           |
| CYP5150G1(146207)Gsp  | 538                           |                                                | 14                          |
| CYP5150H1(90218)Gsp   | 528                           |                                                | 8                           |
| CYP5150J17(59629)Gsp  | 543                           |                                                | 14                          |
| CYP5150J18(123794)Gsp | 467                           |                                                | 14                          |
| CYP5150J16(123793)Gsp | 467                           |                                                | 14                          |
| CYP5150J19(59491)Gsp  | 543                           |                                                | 14                          |
| CYP5150J5(94625)Gsp   | 544                           |                                                | 14                          |
| CYP5150J12(122158)Gsp | 205                           |                                                | 11                          |
| CYP5150J11(122142)Jsp | 545                           |                                                | 11                          |
| CYP5150J13(122244)Gsp | 545                           |                                                | 11                          |
| CYP5150J14(158128)Gsp | 546                           |                                                | 14                          |
| CYP5150J15(158130)Gsp | 604                           |                                                | 14                          |
| CYP5150K2(59427)Gsp   | 547                           |                                                | 14                          |
| CYP5150K4(59616)Gsp   | 548                           |                                                | 14                          |
| CYP5150L8(59501)Gsp   | 516                           |                                                | 14                          |
| CYP5150L9(123691)Gsp  | 542                           |                                                | 14                          |
| CYP5150L7(47827)Gsp   | 539                           |                                                | 5                           |
| CYP5150L6(123698)Gsp  | 546                           |                                                | 14                          |
| CYP5150L1(92661)Gsp   | 540                           |                                                | 11                          |
| CYP5150L3(166075)Gsp  | 549                           |                                                | 11                          |
| CYP5150L2(46997)Gsp   | 550                           |                                                | 4                           |
| CYP5150L4(156784)Gsp  | 543                           |                                                | 11                          |
| CYP5150L10(55691)Gsp  | 539                           |                                                | 12                          |
| CYP5150L11(56190)Gsp  | 546                           |                                                | 12                          |
| CYP5150E2(122651)Gsp  | 598                           |                                                | 12                          |

**Figure S3 continued**

|                        | Protein size<br>(amino acids) | Gene structure<br>(exons/introns organization) | Gene location<br>(scaffold) |
|------------------------|-------------------------------|------------------------------------------------|-----------------------------|
| CYP5150B(253633)Pcar   | 561                           |                                                | 4                           |
| CYP5150B(112917)Pcar   | 562                           |                                                | 2                           |
| CYP5150B(205063)Pcar   | 561                           |                                                | 2                           |
| CYP5150A(205293)Pcar   | 542                           |                                                | 2                           |
| CYP5150B(88318)Pcar    | 562                           |                                                | 2                           |
| CYP5150A(214286)Pcar   | 518                           |                                                | 13                          |
| CYP5150A(131561)Pcar   | 543                           |                                                | 13                          |
| CYP5150A(265429)Pcar   | 543                           |                                                | 13                          |
| CYP5150A(265422)Pcar   | 543                           |                                                | 13                          |
| CYP5150A3(1200)Pchr    | 491                           |                                                | 2                           |
| CYP5150A5(4920)Pchr    | 572                           |                                                | 8                           |
| CYP5150A1(1200)Pchr    | 491                           |                                                | 2                           |
| CYP5150B1(1976)Pchr    | 511                           | 11/10                                          | 2                           |
| CYP5150A4(1751)Pchr    | 488                           | 8/7                                            | 2                           |
| CYP5150A (1162801)Slac | 545                           |                                                | 3                           |
| CYP5150A (1089743)Slac | 546                           |                                                | 3                           |
| CYP5150A(123171)Abis   | 549                           |                                                | 17                          |
| CYP5150A(77755)Abis    | 429                           |                                                | 13                          |
| CYP5150A(144299)Abis   | 541                           |                                                | 7                           |
| CYP5150A(179443)Abis   | 541                           |                                                | 7                           |
| CYP5150A(179442)Abis   | 548                           |                                                | 7                           |
| CYP5150A(193886)Abis   | 561                           |                                                | 7                           |
| CYP5150A(207479)Abis   | 552                           |                                                | 7                           |
| CYP5150A(188304)Abis   | 549                           |                                                | 13                          |
| CYP5150A(79965)Abis    | 545                           |                                                | 18                          |
| CYP5150A(201718)Abis   | 550                           |                                                | 3                           |
| CYP5150A(186683)Abis   | 549                           |                                                | 7                           |
| CYP5150A(207457)Abis   | 547                           |                                                | 7                           |
